# Supplementary material for: The Impact of Infectious Disease-Related Public Health Emergencies on Suicide, Suicidal Behavior, and Suicidal Thoughts
Source: Atypon-hosted journal article supplement (doi:10.1027/0227-5910/a000753), 2020-10-16
Supplement: 0227-5910_a000753_esm1.pdf [file 0227-5910_a000753_esm1.pdf]

# Electronic Supplementary Material

## Contents

|                                                                                     |    |
|-------------------------------------------------------------------------------------|----|
| Full List of Research Questions .....                                               | 2  |
| PRISMA Diagrams .....                                                               | 3  |
| Figure A. PRISMA Diagram for Search 1 (S1) and Search 2 (S2) .....                  | 3  |
| Figure B. PRISMA Diagram for Search 4 (S4) .....                                    | 4  |
| Full Search Strategy .....                                                          | 5  |
| Searches .....                                                                      | 5  |
| Main search .....                                                                   | 5  |
| Grey literature search.....                                                         | 11 |
| Inter-rater Reliability Analysis .....                                              | 12 |
| Data Extraction Tool .....                                                          | 13 |
| Quality Assessment Framework.....                                                   | 14 |
| Additional Publications on the COVID-19 Pandemic and Suicide-Related Outcomes ..... | 15 |
| Preprint .....                                                                      | 15 |
| COVID-19 Case Studies .....                                                         | 16 |
| References.....                                                                     | 17 |

## **Full List of Research Questions**

The research questions guiding this systematic review include: 1) Does exposure to an infectious disease-related public health emergency result in different levels of risk: (a) across age groups (adolescents and young adults; adults; older adults), (b) by sex and gender, (c) across different socio-demographic and economic groups, (d) in people who have been infected compared to those who have not, and (e) in those with pre-existing health conditions (including mental health disorders); (f) does the literature report other groups with increased risk of suicide after an infectious disease-related public health emergency? 2) What can we learn from previous infectious disease-related public health emergencies about the likely impact of the COVID-19 pandemic on the incidence of suicidal behavior, suicidal thoughts, and self-harm? 3) What can we learn from previous infectious disease-related public health emergencies about the likely effectiveness of different interventions to mitigate the impact of the COVID-19 pandemic on the incidence of suicidal behavior, suicidal thoughts, and self-harm?

## PRISMA Diagrams

Figure A. PRISMA Diagram for Search 1 (S1) and Search 2 (S2)

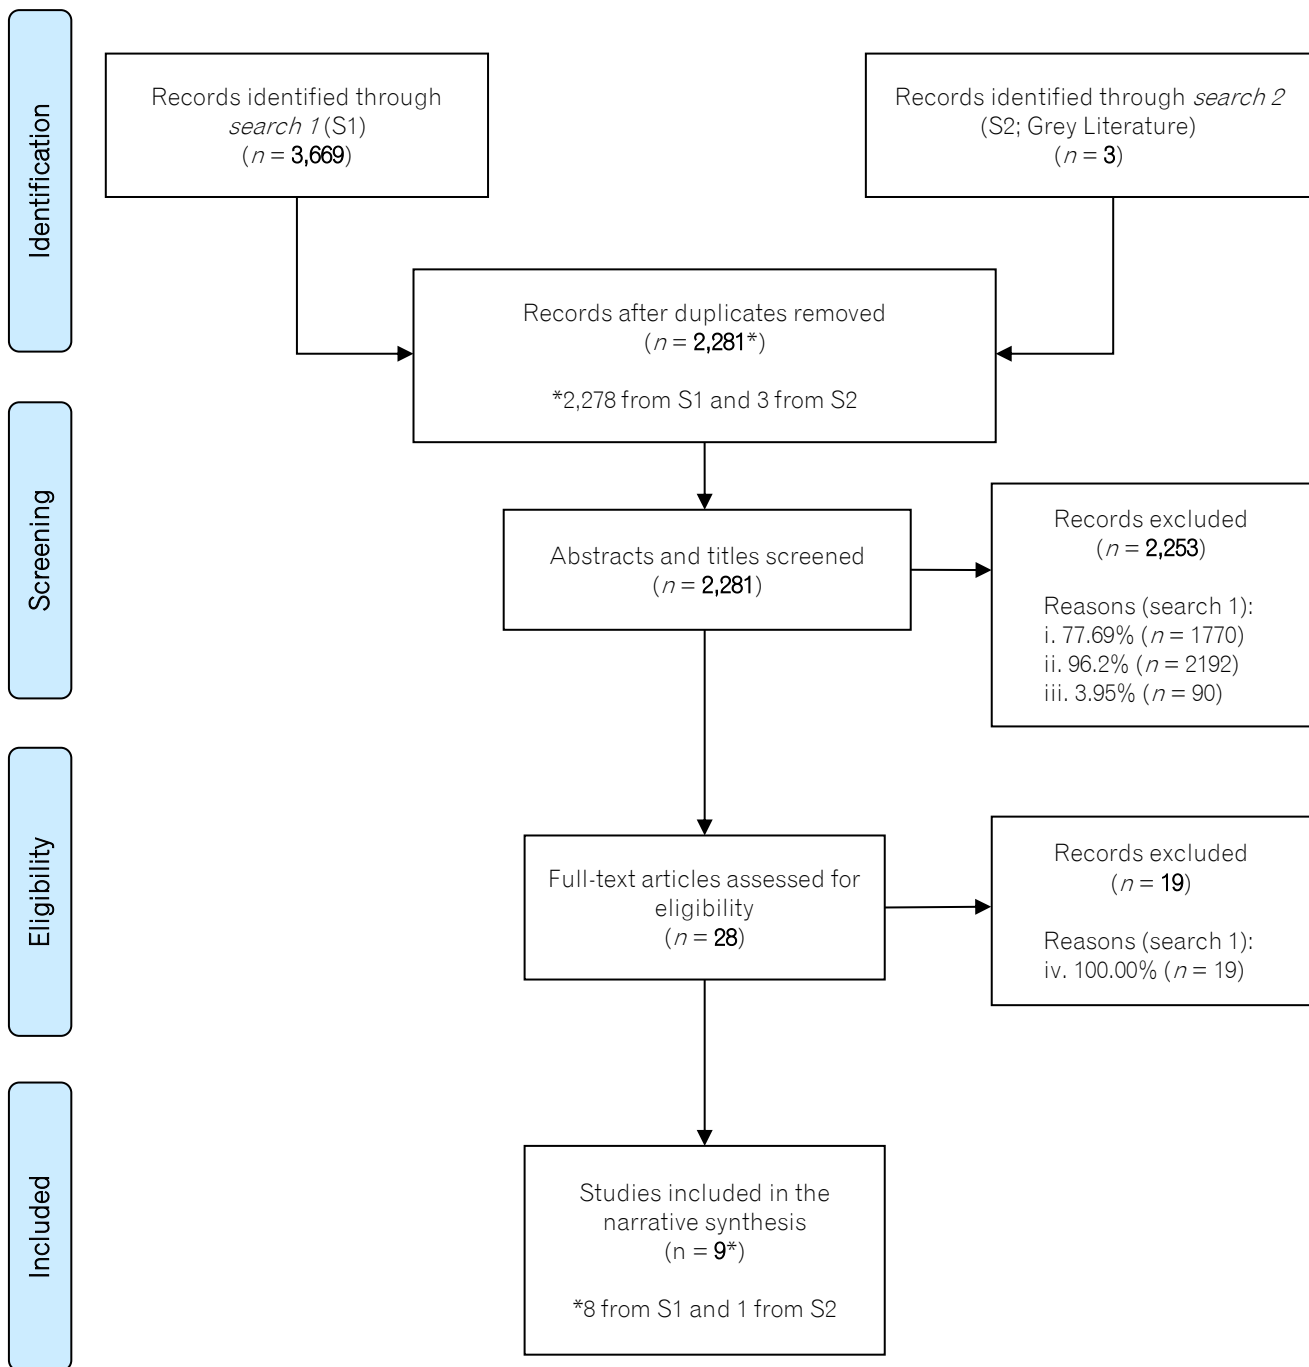

Search 1 and 2 (S1 and S2) PRISMA Diagram: Preferred reporting items for systematic reviews and meta-analyses (PRISMA) flow diagram. Reasons for exclusion: (i) the publication did not focus on suicidal behaviour, suicidal ideation and/or self-harm; (ii) the publication did not focus on any infectious disease-related public health emergency; (iii) The publication was excluded due to its publication type (not a primary study, systematic review, or meta-analysis); (iv) The publication did not contain empirical data eligible for data extraction and quality assessment; and (v) the publication was a duplicate of another in the study pool, missed in the initial duplicate removal.

**Figure B. PRISMA Diagram for Search 4 (S4)**

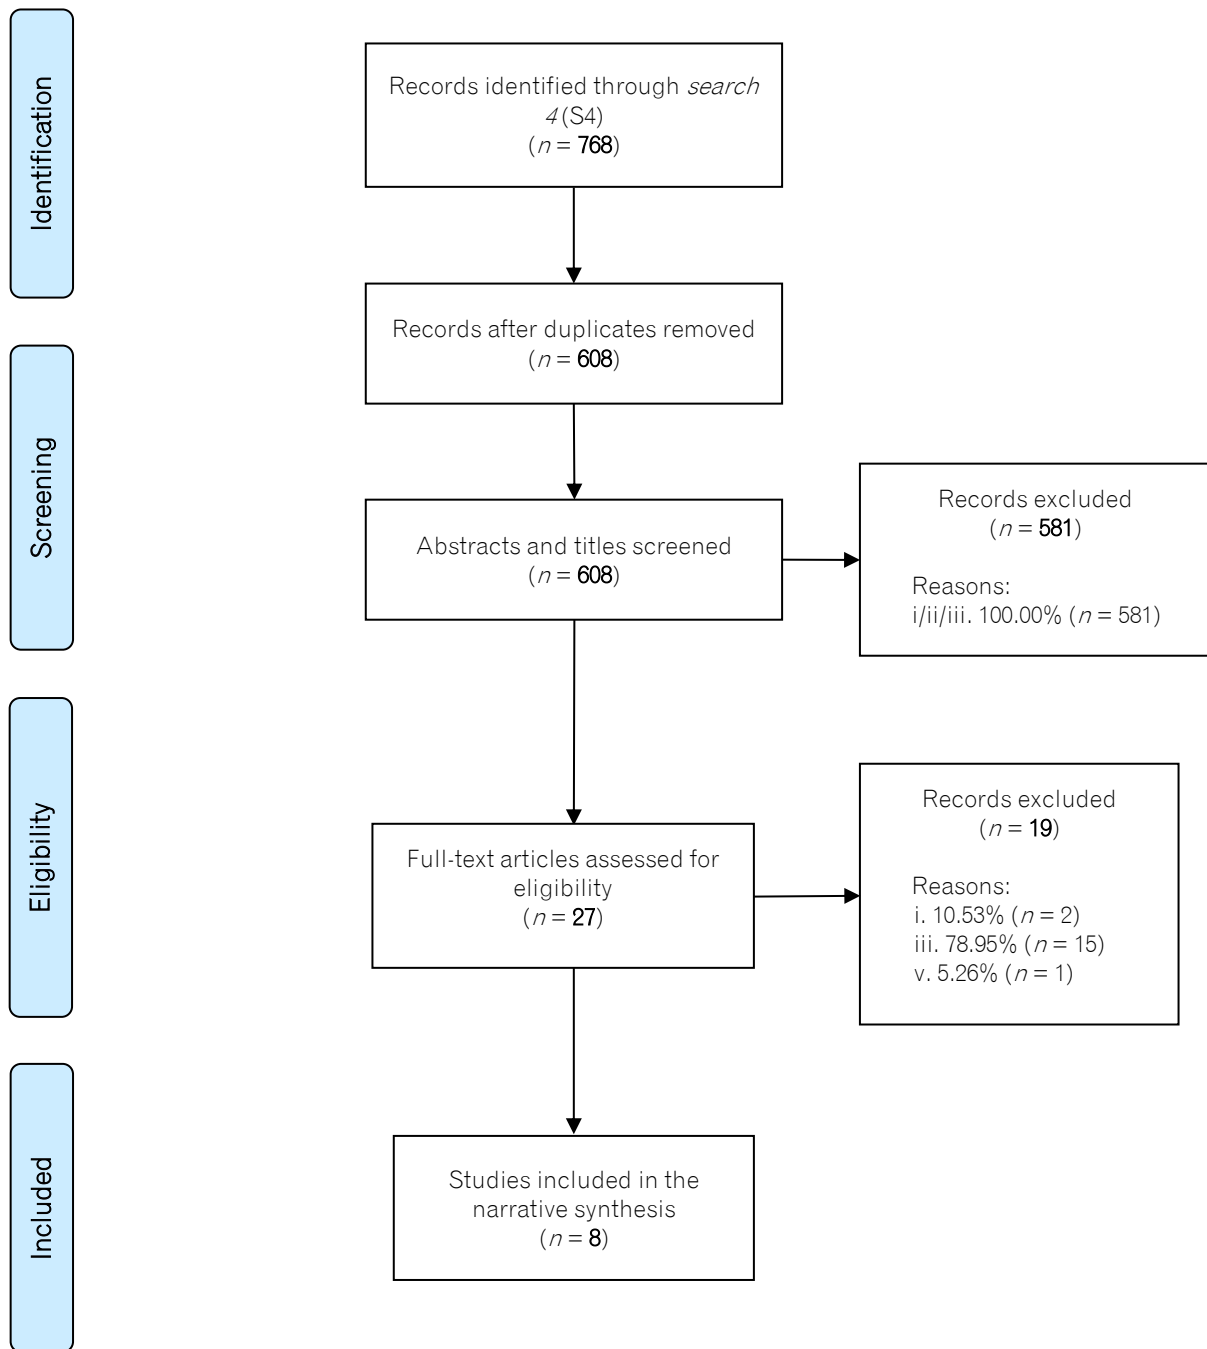

Search 4 (S4) PRISMA Diagram: Preferred reporting items for systematic reviews and meta-analyses (PRISMA) flow diagram. Reasons for exclusion: (i) the publication did not focus on suicidal behaviour, suicidal ideation and/or self-harm; (ii) the publication did not focus on any infectious disease-related public health emergency; (iii) The publication was excluded due to its publication type (not a primary study, systematic review, or meta-analysis); (iv) The publication did not contain empirical data eligible for data extraction and quality assessment; and (v) the publication was a duplicate of another in the study pool, missed in the initial duplicate removal.

# Full Search Strategy

## Searches

### Main search

MEDLINE and EMBASE were searched using keywords and the appropriate subject headings:

MEDLINE (Ovid) Search History

|                          |    |                                                                                                                                                                                                                                                                                                                                                                                                              |       |          |
|--------------------------|----|--------------------------------------------------------------------------------------------------------------------------------------------------------------------------------------------------------------------------------------------------------------------------------------------------------------------------------------------------------------------------------------------------------------|-------|----------|
| <input type="checkbox"/> | 1  | exp Suicide/ or suicide.mp.                                                                                                                                                                                                                                                                                                                                                                                  | 85129 | Advanced |
| <input type="checkbox"/> | 2  | suicides.mp. [mp=title, abstract, original title, name of substance word, subject heading word, floating sub-heading word, keyword heading word, organism supplementary concept word, protocol supplementary concept word, rare disease supplementary concept word, unique identifier, synonyms]                                                                                                             | 7879  | Advanced |
| <input type="checkbox"/> | 3  | exp Self-Injurious Behavior/ or self-harm.mp.                                                                                                                                                                                                                                                                                                                                                                | 72295 | Advanced |
| <input type="checkbox"/> | 4  | ("self-injurious behavior" or "self injurious behavior" or "self-injurious behaviour" or "self injurious behaviour").mp. [mp=title, abstract, original title, name of substance word, subject heading word, floating sub-heading word, keyword heading word, organism supplementary concept word, protocol supplementary concept word, rare disease supplementary concept word, unique identifier, synonyms] | 8570  | Advanced |
| <input type="checkbox"/> | 5  | "self harm".mp. [mp=title, abstract, original title, name of substance word, subject heading word, floating sub-heading word, keyword heading word, organism supplementary concept word, protocol supplementary concept word, rare disease supplementary concept word, unique identifier, synonyms]                                                                                                          | 5597  | Advanced |
| <input type="checkbox"/> | 6  | self-injury.mp.                                                                                                                                                                                                                                                                                                                                                                                              | 2928  | Advanced |
| <input type="checkbox"/> | 7  | "self injury".mp. [mp=title, abstract, original title, name of substance word, subject heading word, floating sub-heading word, keyword heading word, organism supplementary concept word, protocol supplementary concept word, rare disease supplementary concept word, unique identifier, synonyms]                                                                                                        | 2928  | Advanced |
| <input type="checkbox"/> | 8  | suicidal ideation.mp. or exp Suicidal Ideation/                                                                                                                                                                                                                                                                                                                                                              | 12947 | Advanced |
| <input type="checkbox"/> | 9  | self-poisoning.mp.                                                                                                                                                                                                                                                                                                                                                                                           | 1705  | Advanced |
| <input type="checkbox"/> | 10 | "self poisoning".mp. [mp=title, abstract, original title, name of substance word, subject heading word, floating sub-heading word, keyword heading word, organism supplementary concept word, protocol supplementary concept word, rare disease supplementary concept word, unique identifier, synonyms]                                                                                                     | 1705  | Advanced |
| <input type="checkbox"/> | 11 | suicidal poisoning.mp.                                                                                                                                                                                                                                                                                                                                                                                       | 176   | Advanced |
| <input type="checkbox"/> | 12 | suicidal.mp.                                                                                                                                                                                                                                                                                                                                                                                                 | 29469 | Advanced |
| <input type="checkbox"/> | 13 | ("suicidal overdose" or "intentional overdose" or "intentional drug overdose").mp. [mp=title, abstract, original title, name of substance word, subject heading word, floating sub-heading word, keyword heading word, organism supplementary concept word, protocol supplementary concept word, rare disease supplementary concept word, unique identifier, synonyms]                                       | 326   | Advanced |
| <input type="checkbox"/> | 14 | automutilation.mp.                                                                                                                                                                                                                                                                                                                                                                                           | 102   | Advanced |

|                          |    |                                                                                                                                                                                                                                                                                                                             |        |          |
|--------------------------|----|-----------------------------------------------------------------------------------------------------------------------------------------------------------------------------------------------------------------------------------------------------------------------------------------------------------------------------|--------|----------|
| <input type="checkbox"/> | 15 | auto-mutilation.mp. [mp=title, abstract, original title, name of substance word, subject heading word, floating sub-heading word, keyword heading word, organism supplementary concept word, protocol supplementary concept word, rare disease supplementary concept word, unique identifier, synonyms]                     | 21     | Advanced |
| <input type="checkbox"/> | 16 | self mutilation.mp. or exp Self Mutilation/                                                                                                                                                                                                                                                                                 | 3823   | Advanced |
| <input type="checkbox"/> | 17 | self-mutilation.mp. [mp=title, abstract, original title, name of substance word, subject heading word, floating sub-heading word, keyword heading word, organism supplementary concept word, protocol supplementary concept word, rare disease supplementary concept word, unique identifier, synonyms]                     | 3823   | Advanced |
| <input type="checkbox"/> | 18 | parasuicide.mp. [mp=title, abstract, original title, name of substance word, subject heading word, floating sub-heading word, keyword heading word, organism supplementary concept word, protocol supplementary concept word, rare disease supplementary concept word, unique identifier, synonyms]                         | 486    | Advanced |
| <input type="checkbox"/> | 19 | suicidal thoughts.mp.                                                                                                                                                                                                                                                                                                       | 2583   | Advanced |
| <input type="checkbox"/> | 20 | suicidal thought.mp. [mp=title, abstract, original title, name of substance word, subject heading word, floating sub-heading word, keyword heading word, organism supplementary concept word, protocol supplementary concept word, rare disease supplementary concept word, unique identifier, synonyms]                    | 85     | Advanced |
| <input type="checkbox"/> | 21 | self-cutting.mp. [mp=title, abstract, original title, name of substance word, subject heading word, floating sub-heading word, keyword heading word, organism supplementary concept word, protocol supplementary concept word, rare disease supplementary concept word, unique identifier, synonyms]                        | 182    | Advanced |
| <input type="checkbox"/> | 22 | "self cutting".mp. [mp=title, abstract, original title, name of substance word, subject heading word, floating sub-heading word, keyword heading word, organism supplementary concept word, protocol supplementary concept word, rare disease supplementary concept word, unique identifier, synonyms]                      | 182    | Advanced |
| <input type="checkbox"/> | 23 | 1 or 2 or 3 or 4 or 5 or 6 or 7 or 8 or 9 or 10 or 11 or 12 or 13 or 14 or 15 or 16 or 17 or 18 or 19 or 20 or 21 or 22                                                                                                                                                                                                     | 103016 | Advanced |
| <input type="checkbox"/> | 24 | pandemic.mp. or Pandemics/                                                                                                                                                                                                                                                                                                  | 29306  | Advanced |
| <input type="checkbox"/> | 25 | pandemics.mp. [mp=title, abstract, original title, name of substance word, subject heading word, floating sub-heading word, keyword heading word, organism supplementary concept word, protocol supplementary concept word, rare disease supplementary concept word, unique identifier, synonyms]                           | 10064  | Advanced |
| <input type="checkbox"/> | 26 | epidemic.mp. or exp Epidemics/                                                                                                                                                                                                                                                                                              | 99581  | Advanced |
| <input type="checkbox"/> | 27 | epidemics.mp. [mp=title, abstract, original title, name of substance word, subject heading word, floating sub-heading word, keyword heading word, organism supplementary concept word, protocol supplementary concept word, rare disease supplementary concept word, unique identifier, synonyms]                           | 29897  | Advanced |
| <input type="checkbox"/> | 28 | outbreaks.mp. or exp Disease Outbreaks/                                                                                                                                                                                                                                                                                     | 124672 | Advanced |
| <input type="checkbox"/> | 29 | outbreak.mp. [mp=title, abstract, original title, name of substance word, subject heading word, floating sub-heading word, keyword heading word, organism supplementary concept word, protocol supplementary concept word, rare disease supplementary concept word, unique identifier, synonyms]                            | 58600  | Advanced |
| <input type="checkbox"/> | 30 | public health emergency.mp.                                                                                                                                                                                                                                                                                                 | 1647   | Advanced |
| <input type="checkbox"/> | 31 | "public health emergencies".mp. [mp=title, abstract, original title, name of substance word, subject heading word, floating sub-heading word, keyword heading word, organism supplementary concept word, protocol supplementary concept word, rare disease supplementary concept word, unique identifier, synonyms]         | 785    | Advanced |
| <input type="checkbox"/> | 32 | 24 or 25 or 26 or 27 or 28 or 29 or 30 or 31                                                                                                                                                                                                                                                                                | 232905 | Advanced |
| <input type="checkbox"/> | 33 | influenza.mp. or exp Influenza, Human/                                                                                                                                                                                                                                                                                      | 110126 | Advanced |
| <input type="checkbox"/> | 34 | Influenza A Virus.mp. or exp Influenza A virus/                                                                                                                                                                                                                                                                             | 46436  | Advanced |
| <input type="checkbox"/> | 35 | influenza pandemic.mp.                                                                                                                                                                                                                                                                                                      | 3352   | Advanced |
| <input type="checkbox"/> | 36 | H2N2.mp.                                                                                                                                                                                                                                                                                                                    | 672    | Advanced |
| <input type="checkbox"/> | 37 | H3N2.mp. [mp=title, abstract, original title, name of substance word, subject heading word, floating sub-heading word, keyword heading word, organism supplementary concept word, protocol supplementary concept word, rare disease supplementary concept word, unique identifier, synonyms]                                | 7721   | Advanced |
| <input type="checkbox"/> | 38 | exp Influenza Pandemic, 1918-1919/ or Spanish flu.mp.                                                                                                                                                                                                                                                                       | 307    | Advanced |
| <input type="checkbox"/> | 39 | Asian flu.mp.                                                                                                                                                                                                                                                                                                               | 44     | Advanced |
| <input type="checkbox"/> | 40 | Hong Kong flu.mp.                                                                                                                                                                                                                                                                                                           | 30     | Advanced |
| <input type="checkbox"/> | 41 | exp Ebolavirus/ or exp Hemorrhagic Fever, Ebola/ or Ebola.mp.                                                                                                                                                                                                                                                               | 9132   | Advanced |
| <input type="checkbox"/> | 42 | exp SARS Virus/ or SARS.mp. or exp Severe Acute Respiratory Syndrome/                                                                                                                                                                                                                                                       | 13542  | Advanced |
| <input type="checkbox"/> | 43 | "Severe acute respiratory syndrome".mp. [mp=title, abstract, original title, name of substance word, subject heading word, floating sub-heading word, keyword heading word, organism supplementary concept word, protocol supplementary concept word, rare disease supplementary concept word, unique identifier, synonyms] | 10036  | Advanced |
| <input type="checkbox"/> | 44 | exp Coronavirus Infections/ or exp Coronavirus/ or Coronavirus.mp.                                                                                                                                                                                                                                                          | 24815  | Advanced |
| <input type="checkbox"/> | 45 | MERS.mp. or exp Middle East Respiratory Syndrome Coronavirus/                                                                                                                                                                                                                                                               | 4675   | Advanced |



|                          |    |                                                                                                                                                                                                                                                                                                                                                                                                                                              |       |          |
|--------------------------|----|----------------------------------------------------------------------------------------------------------------------------------------------------------------------------------------------------------------------------------------------------------------------------------------------------------------------------------------------------------------------------------------------------------------------------------------------|-------|----------|
| <input type="checkbox"/> | 46 | "Middle East Respiratory Syndrome".mp. [mp=title, abstract, original title, name of substance word, subject heading word, floating sub-heading word, keyword heading word, organism supplementary concept word, protocol supplementary concept word, rare disease supplementary concept word, unique identifier, synonyms]                                                                                                                   | 2206  | Advanced |
| <input type="checkbox"/> | 47 | Covid.mp. or exp Betacoronavirus/                                                                                                                                                                                                                                                                                                                                                                                                            | 17705 | Advanced |
| <input type="checkbox"/> | 48 | Betacoronavirus.mp. [mp=title, abstract, original title, name of substance word, subject heading word, floating sub-heading word, keyword heading word, organism supplementary concept word, protocol supplementary concept word, rare disease supplementary concept word, unique identifier, synonyms]                                                                                                                                      | 2569  | Advanced |
| <input type="checkbox"/> | 49 | covid-19.mp. [mp=title, abstract, original title, name of substance word, subject heading word, floating sub-heading word, keyword heading word, organism supplementary concept word, protocol supplementary concept word, rare disease supplementary concept word, unique identifier, synonyms]                                                                                                                                             | 11328 | Advanced |
| <input type="checkbox"/> | 50 | Swine flu.mp.                                                                                                                                                                                                                                                                                                                                                                                                                                | 956   | Advanced |
| <input type="checkbox"/> | 51 | exp Zika Virus Infection/ or exp Zika Virus/ or zika.mp.                                                                                                                                                                                                                                                                                                                                                                                     | 7790  | Advanced |
| <input type="checkbox"/> | 52 | Arbovirus.mp. or exp Arboviruses/                                                                                                                                                                                                                                                                                                                                                                                                            | 9334  | Advanced |
| <input type="checkbox"/> | 53 | Arboviruses.mp. [mp=title, abstract, original title, name of substance word, subject heading word, floating sub-heading word, keyword heading word, organism supplementary concept word, protocol supplementary concept word, rare disease supplementary concept word, unique identifier, synonyms]                                                                                                                                          | 5816  | Advanced |
| <input type="checkbox"/> | 54 | Dengue.mp. or exp Dengue/ or exp Severe Dengue/ or exp Dengue Virus/                                                                                                                                                                                                                                                                                                                                                                         | 22867 | Advanced |
| <input type="checkbox"/> | 55 | Yellow Fever/ or Yellow fever.mp.                                                                                                                                                                                                                                                                                                                                                                                                            | 6871  | Advanced |
| <input type="checkbox"/> | 56 | Hemorrhagic fever.mp.                                                                                                                                                                                                                                                                                                                                                                                                                        | 13929 | Advanced |
| <input type="checkbox"/> | 57 | Haemorrhagic fever.mp.                                                                                                                                                                                                                                                                                                                                                                                                                       | 2098  | Advanced |
| <input type="checkbox"/> | 58 | exp Encephalitis/ or Encephalitis.mp.                                                                                                                                                                                                                                                                                                                                                                                                        | 66978 | Advanced |
| <input type="checkbox"/> | 59 | exp Plague/ or Plague.mp.                                                                                                                                                                                                                                                                                                                                                                                                                    | 10458 | Advanced |
| <input type="checkbox"/> | 60 | Bubonic plague.mp.                                                                                                                                                                                                                                                                                                                                                                                                                           | 555   | Advanced |
| <input type="checkbox"/> | 61 | exp Smallpox/ or Smallpox.mp.                                                                                                                                                                                                                                                                                                                                                                                                                | 9866  | Advanced |
| <input type="checkbox"/> | 62 | "small pox".mp. [mp=title, abstract, original title, name of substance word, subject heading word, floating sub-heading word, keyword heading word, organism supplementary concept word, protocol supplementary concept word, rare disease supplementary concept word, unique identifier, synonyms]                                                                                                                                          | 735   | Advanced |
| <input type="checkbox"/> | 63 | H1N1.mp. [mp=title, abstract, original title, name of substance word, subject heading word, floating sub-heading word, keyword heading word, organism supplementary concept word, protocol supplementary concept word, rare disease supplementary concept word, unique identifier, synonyms]                                                                                                                                                 | 20940 | Advanced |
| <input type="checkbox"/> | 64 | H7N9.mp. [mp=title, abstract, original title, name of substance word, subject heading word, floating sub-heading word, keyword heading word, organism supplementary concept word, protocol supplementary concept word, rare disease supplementary concept word, unique identifier, synonyms]                                                                                                                                                 | 1920  | Advanced |
| <input type="checkbox"/> | 65 | SARS-CoV-3.mp. [mp=title, abstract, original title, name of substance word, subject heading word, floating sub-heading word, keyword heading word, organism supplementary concept word, protocol supplementary concept word, rare disease supplementary concept word, unique identifier, synonyms]                                                                                                                                           | 2     | Advanced |
| <input type="checkbox"/> | 66 | exp Chikungunya virus/ or exp Chikungunya Fever/ or Chikungunya.mp.                                                                                                                                                                                                                                                                                                                                                                          | 5489  | Advanced |
| <input type="checkbox"/> | 67 | Cholera.mp. or exp Cholera/                                                                                                                                                                                                                                                                                                                                                                                                                  | 27528 | Advanced |
| <input type="checkbox"/> | 68 | ("Crimean-Congo haemorrhagic fever" or "Crimean Congo haemorrhagic fever" or "Crimean-Congo hemorrhagic fever" or "Crimean Congo hemorrhagic fever").mp. [mp=title, abstract, original title, name of substance word, subject heading word, floating sub-heading word, keyword heading word, organism supplementary concept word, protocol supplementary concept word, rare disease supplementary concept word, unique identifier, synonyms] | 1394  | Advanced |
| <input type="checkbox"/> | 69 | Hendra virus.mp. or exp Hendra Virus/                                                                                                                                                                                                                                                                                                                                                                                                        | 473   | Advanced |
| <input type="checkbox"/> | 70 | Lassa fever.mp. or exp Lassa Fever/                                                                                                                                                                                                                                                                                                                                                                                                          | 1029  | Advanced |
| <input type="checkbox"/> | 71 | exp Marburgvirus/ or exp Marburg Virus Disease/ or Marburg.mp.                                                                                                                                                                                                                                                                                                                                                                               | 2356  | Advanced |
| <input type="checkbox"/> | 72 | Meningitis.mp. or exp Meningitis/                                                                                                                                                                                                                                                                                                                                                                                                            | 75429 | Advanced |
| <input type="checkbox"/> | 73 | MERS-CoV.mp. [mp=title, abstract, original title, name of substance word, subject heading word, floating sub-heading word, keyword heading word, organism supplementary concept word, protocol supplementary concept word, rare disease supplementary concept word, unique identifier, synonyms]                                                                                                                                             | 1766  | Advanced |
| <input type="checkbox"/> | 74 | exp Monkeypox virus/ or exp Monkeypox/ or Monkeypox.mp.                                                                                                                                                                                                                                                                                                                                                                                      | 801   | Advanced |
| <input type="checkbox"/> | 75 | Nipah virus.mp. or exp Nipah Virus/                                                                                                                                                                                                                                                                                                                                                                                                          | 892   | Advanced |
| <input type="checkbox"/> | 76 | Rift valley fever.mp. or exp Rift Valley Fever/                                                                                                                                                                                                                                                                                                                                                                                              | 1974  | Advanced |
| <input type="checkbox"/> | 77 | exp Tularemia/ or Tularaemia.mp.                                                                                                                                                                                                                                                                                                                                                                                                             | 3486  | Advanced |

|                          |    |                                                                                                                                                                                                                                                                                                   |        |          |
|--------------------------|----|---------------------------------------------------------------------------------------------------------------------------------------------------------------------------------------------------------------------------------------------------------------------------------------------------|--------|----------|
| <input type="checkbox"/> | 78 | Tularemia.mp. [mp=title, abstract, original title, name of substance word, subject heading word, floating sub-heading word, keyword heading word, organism supplementary concept word, protocol supplementary concept word, rare disease supplementary concept word, unique identifier, synonyms] | 4114   | Advanced |
| <input type="checkbox"/> | 79 | 33 or 34 or 35 or 36 or 37 or 38 or 39 or 40 or 41 or 42 or 43 or 44 or 45 or 46 or 47 or 48 or 49 or 50 or 51 or 52 or 53 or 54 or 55 or 56 or 57 or 58 or 59 or 60 or 61 or 62 or 63 or 64 or 65 or 66 or 67 or 68 or 69 or 70 or 71 or 72 or 73 or 74 or 75 or 76 or 77 or 78                  | 376006 | Advanced |
| <input type="checkbox"/> | 80 | 23 and 32 and 79                                                                                                                                                                                                                                                                                  | 59     | Advanced |
| <input type="checkbox"/> | 81 | 23 and 79                                                                                                                                                                                                                                                                                         | 362    | Advanced |
| <input type="checkbox"/> | 82 | 80 or 81                                                                                                                                                                                                                                                                                          | 362    | Advanced |

### EMBASE (Ovid) Search History

|                          |    |                                                                                                                                                                                                                                                                                                  |        |          |
|--------------------------|----|--------------------------------------------------------------------------------------------------------------------------------------------------------------------------------------------------------------------------------------------------------------------------------------------------|--------|----------|
| <input type="checkbox"/> | 1  | exp suicide/ or Suicide.mp.                                                                                                                                                                                                                                                                      | 112332 | Advanced |
| <input type="checkbox"/> | 2  | "suicides".mp. [mp=title, abstract, heading word, drug trade name, original title, device manufacturer, drug manufacturer, device trade name, keyword, floating subheading word, candidate term word]                                                                                            | 10398  | Advanced |
| <input type="checkbox"/> | 3  | self-harm.mp. or exp automutilation/                                                                                                                                                                                                                                                             | 21146  | Advanced |
| <input type="checkbox"/> | 4  | Self-injurious behaviour.mp.                                                                                                                                                                                                                                                                     | 567    | Advanced |
| <input type="checkbox"/> | 5  | self-injury.mp.                                                                                                                                                                                                                                                                                  | 3649   | Advanced |
| <input type="checkbox"/> | 6  | ("self harm" or "self injurious behaviour" or "self-injurious behavior" or "self injurious behavior").mp. [mp=title, abstract, heading word, drug trade name, original title, device manufacturer, drug manufacturer, device trade name, keyword, floating subheading word, candidate term word] | 9792   | Advanced |
| <input type="checkbox"/> | 7  | Suicidal Ideation.mp. or exp suicidal ideation/                                                                                                                                                                                                                                                  | 23700  | Advanced |
| <input type="checkbox"/> | 8  | self-poisoning.mp. or exp self poisoning/                                                                                                                                                                                                                                                        | 3038   | Advanced |
| <input type="checkbox"/> | 9  | ("self poisoning" or "suicidal poisoning").mp. [mp=title, abstract, heading word, drug trade name, original title, device manufacturer, drug manufacturer, device trade name, keyword, floating subheading word, candidate term word]                                                            | 3318   | Advanced |
| <input type="checkbox"/> | 10 | "suicidal".mp. [mp=title, abstract, heading word, drug trade name, original title, device manufacturer, drug manufacturer, device trade name, keyword, floating subheading word, candidate term word]                                                                                            | 52319  | Advanced |
| <input type="checkbox"/> | 11 | ("suicidal overdose" or "intentional overdose" or "intentional drug overdose").mp. [mp=title, abstract, heading word, drug trade name, original title, device manufacturer, drug manufacturer, device trade name, keyword, floating subheading word, candidate term word]                        | 537    | Advanced |
| <input type="checkbox"/> | 12 | ("auto mutilation" or "auto-mutilation" or "self mutilation" or "self-mutilation").mp. [mp=title, abstract, heading word, drug trade name, original title, device manufacturer, drug manufacturer, device trade name, keyword, floating subheading word, candidate term word]                    | 2076   | Advanced |
| <input type="checkbox"/> | 13 | parasuicide.mp.                                                                                                                                                                                                                                                                                  | 678    | Advanced |
| <input type="checkbox"/> | 14 | ("suicidal thoughts" or "suicidal thought").mp. [mp=title, abstract, heading word, drug trade name, original title, device manufacturer, drug manufacturer, device trade name, keyword, floating subheading word, candidate term word]                                                           | 3462   | Advanced |
| <input type="checkbox"/> | 15 | self-cutting.mp.                                                                                                                                                                                                                                                                                 | 244    | Advanced |
| <input type="checkbox"/> | 16 | self cutting.mp.                                                                                                                                                                                                                                                                                 | 244    | Advanced |
| <input type="checkbox"/> | 17 | 1 or 2 or 3 or 4 or 5 or 6 or 7 or 8 or 9 or 10 or 11 or 12 or 13 or 14 or 15 or 16                                                                                                                                                                                                              | 148859 | Advanced |
| <input type="checkbox"/> | 18 | exp pandemic influenza/ or exp pandemic/ or pandemic.mp.                                                                                                                                                                                                                                         | 33973  | Advanced |
| <input type="checkbox"/> | 19 | "pandemics".mp. [mp=title, abstract, heading word, drug trade name, original title, device manufacturer, drug manufacturer, device trade name, keyword, floating subheading word, candidate term word]                                                                                           | 4036   | Advanced |
| <input type="checkbox"/> | 20 | epidemic.mp. or exp epidemic/                                                                                                                                                                                                                                                                    | 186709 | Advanced |
| <input type="checkbox"/> | 21 | "epidemics".mp. [mp=title, abstract, heading word, drug trade name, original title, device manufacturer, drug manufacturer, device trade name, keyword, floating subheading word, candidate term word]                                                                                           | 26367  | Advanced |
| <input type="checkbox"/> | 22 | outbreak.mp.                                                                                                                                                                                                                                                                                     | 68760  | Advanced |
| <input type="checkbox"/> | 23 | "outbreaks".mp. [mp=title, abstract, heading word, drug trade name, original title, device manufacturer, drug manufacturer, device trade name, keyword, floating subheading word, candidate term word]                                                                                           | 54783  | Advanced |
| <input type="checkbox"/> | 24 | public health emergency.mp.                                                                                                                                                                                                                                                                      | 1748   | Advanced |
| <input type="checkbox"/> | 25 | "public health emergencies".mp. [mp=title, abstract, heading word, drug trade name, original title, device manufacturer, drug manufacturer, device trade name, keyword, floating subheading word, candidate term word]                                                                           | 775    | Advanced |
| <input type="checkbox"/> | 26 | 18 or 19 or 20 or 21 or 22 or 23 or 24 or 25                                                                                                                                                                                                                                                     | 282275 | Advanced |
| <input type="checkbox"/> | 27 | exp influenza/ or Influenza.mp. or exp influenza A/                                                                                                                                                                                                                                              | 163099 | Advanced |
| <input type="checkbox"/> | 28 | "influenza pandemic".mp. [mp=title, abstract, heading word, drug trade name, original title, device manufacturer, drug manufacturer, device trade name, keyword, floating subheading word, candidate term word]                                                                                  | 3862   | Advanced |



|                          |    |                                                                                                                                                                                                                                         |        |          |
|--------------------------|----|-----------------------------------------------------------------------------------------------------------------------------------------------------------------------------------------------------------------------------------------|--------|----------|
| <input type="checkbox"/> | 29 | H2N2.mp. or exp "Influenza A virus (H2N2)"/                                                                                                                                                                                             | 1695   | Advanced |
| <input type="checkbox"/> | 30 | H3N2.mp. or exp "Influenza A virus (H3N2)"/                                                                                                                                                                                             | 10509  | Advanced |
| <input type="checkbox"/> | 31 | spanish flu.mp. or exp Spanish influenza/                                                                                                                                                                                               | 654    | Advanced |
| <input type="checkbox"/> | 32 | "spanish influenza".mp. [mp=title, abstract, heading word, drug trade name, original title, device manufacturer, drug manufacturer, device trade name, keyword, floating subheading word, candidate term word]                          | 655    | Advanced |
| <input type="checkbox"/> | 33 | asian flu.mp. or exp Asian influenza/                                                                                                                                                                                                   | 443    | Advanced |
| <input type="checkbox"/> | 34 | hong kong flu.mp. or exp Hong Kong influenza/                                                                                                                                                                                           | 263    | Advanced |
| <input type="checkbox"/> | 35 | ("asian influenza" or "hong kong influenza").mp. [mp=title, abstract, heading word, drug trade name, original title, device manufacturer, drug manufacturer, device trade name, keyword, floating subheading word, candidate term word] | 957    | Advanced |
| <input type="checkbox"/> | 36 | ebola.mp. or exp Ebola hemorrhagic fever/                                                                                                                                                                                               | 11671  | Advanced |
| <input type="checkbox"/> | 37 | SARS.mp. or exp severe acute respiratory syndrome/                                                                                                                                                                                      | 16466  | Advanced |
| <input type="checkbox"/> | 38 | "severe acute respiratory syndrome".mp. [mp=title, abstract, heading word, drug trade name, original title, device manufacturer, drug manufacturer, device trade name, keyword, floating subheading word, candidate term word]          | 11795  | Advanced |
| <input type="checkbox"/> | 39 | Covid.mp.                                                                                                                                                                                                                               | 7105   | Advanced |
| <input type="checkbox"/> | 40 | coronavirus.mp. or exp Coronavirinae/                                                                                                                                                                                                   | 26244  | Advanced |
| <input type="checkbox"/> | 41 | "Covid-19".mp. [mp=title, abstract, heading word, drug trade name, original title, device manufacturer, drug manufacturer, device trade name, keyword, floating subheading word, candidate term word]                                   | 7050   | Advanced |
| <input type="checkbox"/> | 42 | MERS.mp.                                                                                                                                                                                                                                | 4894   | Advanced |
| <input type="checkbox"/> | 43 | middle east respiratory syndrome.mp. or exp Middle East respiratory syndrome/                                                                                                                                                           | 3006   | Advanced |
| <input type="checkbox"/> | 44 | swine flu.mp. or exp swine influenza/                                                                                                                                                                                                   | 1984   | Advanced |
| <input type="checkbox"/> | 45 | "swine influenza".mp. [mp=title, abstract, heading word, drug trade name, original title, device manufacturer, drug manufacturer, device trade name, keyword, floating subheading word, candidate term word]                            | 3108   | Advanced |
| <input type="checkbox"/> | 46 | exp Zika virus/ or zika.mp. or exp Zika fever/                                                                                                                                                                                          | 10344  | Advanced |
| <input type="checkbox"/> | 47 | Arbovirus.mp. or exp Arbovirus/                                                                                                                                                                                                         | 9399   | Advanced |
| <input type="checkbox"/> | 48 | Dengue.mp. or exp dengue/ or exp Dengue virus/ or exp severe dengue/                                                                                                                                                                    | 32632  | Advanced |
| <input type="checkbox"/> | 49 | yellow fever.mp. or exp yellow fever/                                                                                                                                                                                                   | 10142  | Advanced |
| <input type="checkbox"/> | 50 | hemorrhagic fever.mp. or exp hemorrhagic fever/                                                                                                                                                                                         | 25962  | Advanced |
| <input type="checkbox"/> | 51 | "haemorrhagic fever".mp. [mp=title, abstract, heading word, drug trade name, original title, device manufacturer, drug manufacturer, device trade name, keyword, floating subheading word, candidate term word]                         | 2864   | Advanced |
| <input type="checkbox"/> | 52 | encephalitis.mp. or exp encephalitis/                                                                                                                                                                                                   | 136154 | Advanced |
| <input type="checkbox"/> | 53 | exp plague/ or plague.mp.                                                                                                                                                                                                               | 13519  | Advanced |
| <input type="checkbox"/> | 54 | "bubonic plague".mp. [mp=title, abstract, heading word, drug trade name, original title, device manufacturer, drug manufacturer, device trade name, keyword, floating subheading word, candidate term word]                             | 646    | Advanced |
| <input type="checkbox"/> | 55 | smallpox.mp. or exp smallpox/ or exp Smallpox virus/                                                                                                                                                                                    | 14934  | Advanced |
| <input type="checkbox"/> | 56 | "small pox".mp. [mp=title, abstract, heading word, drug trade name, original title, device manufacturer, drug manufacturer, device trade name, keyword, floating subheading word, candidate term word]                                  | 400    | Advanced |
| <input type="checkbox"/> | 57 | ("H1N1" or "H7N9" or "SARS-COV-3").mp. [mp=title, abstract, heading word, drug trade name, original title, device manufacturer, drug manufacturer, device trade name, keyword, floating subheading word, candidate term word]           | 30803  | Advanced |
| <input type="checkbox"/> | 58 | chikungunya.mp. or exp Chikungunya virus/ or exp chikungunya/                                                                                                                                                                           | 8143   | Advanced |
| <input type="checkbox"/> | 59 | exp cholera/ or cholera.mp.                                                                                                                                                                                                             | 33314  | Advanced |
| <input type="checkbox"/> | 60 | Hendra virus.mp. or exp Hendra virus/                                                                                                                                                                                                   | 677    | Advanced |
| <input type="checkbox"/> | 61 | Lassa Fever.mp. or exp Lassa fever/                                                                                                                                                                                                     | 1289   | Advanced |
| <input type="checkbox"/> | 62 | exp Marburg hemorrhagic fever/ or Marburg.mp. or exp Marburg virus/                                                                                                                                                                     | 3723   | Advanced |

|                          |    |                                                                                                                                                                                                                                                                |        |          |
|--------------------------|----|----------------------------------------------------------------------------------------------------------------------------------------------------------------------------------------------------------------------------------------------------------------|--------|----------|
| <input type="checkbox"/> | 63 | exp meningitis/ or meningitis.mp.                                                                                                                                                                                                                              | 122368 | Advanced |
| <input type="checkbox"/> | 64 | "MERS-CoV".mp. [mp=title, abstract, heading word, drug trade name, original title, device manufacturer, drug manufacturer, device trade name, keyword, floating subheading word, candidate term word]                                                          | 1831   | Advanced |
| <input type="checkbox"/> | 65 | Monkeypox.mp. or exp monkeypox/ or exp Monkeypox virus/                                                                                                                                                                                                        | 1148   | Advanced |
| <input type="checkbox"/> | 66 | Nipah Virus.mp. or exp Nipah virus/                                                                                                                                                                                                                            | 1314   | Advanced |
| <input type="checkbox"/> | 67 | Rift Valley Fever.mp. or exp Rift Valley fever/                                                                                                                                                                                                                | 2498   | Advanced |
| <input type="checkbox"/> | 68 | Tularemia.mp. or exp tularemia/                                                                                                                                                                                                                                | 5187   | Advanced |
| <input type="checkbox"/> | 69 | "tularaemia".mp. [mp=title, abstract, heading word, drug trade name, original title, device manufacturer, drug manufacturer, device trade name, keyword, floating subheading word, candidate term word]                                                        | 846    | Advanced |
| <input type="checkbox"/> | 70 | 27 or 28 or 29 or 30 or 31 or 32 or 33 or 34 or 35 or 36 or 37 or 38 or 39 or 40 or 41 or 42 or 43 or 44 or 45 or 46 or 47 or 48 or 49 or 50 or 51 or 52 or 53 or 54 or 55 or 56 or 57 or 58 or 59 or 60 or 61 or 62 or 63 or 64 or 65 or 66 or 67 or 68 or 69 | 552000 | Advanced |
| <input type="checkbox"/> | 71 | 17 and 26 and 70                                                                                                                                                                                                                                               | 122    | Advanced |
| <input type="checkbox"/> | 72 | 17 and 70                                                                                                                                                                                                                                                      | 1393   | Advanced |
| <input type="checkbox"/> | 73 | 71 or 72                                                                                                                                                                                                                                                       | 1393   | Advanced |

A keyword search was conducted in PsycInfo, PsycArticles, CINAHL, Scopus, and Web of Science (including Web of Science Core Collection, BIOSIS Citation Index, BIOSIS Previews, CABI: CAB Abstracts, Current Contents Connect, Data Citation Index, Derwent Innovations Index, KCI-Korean Journal Database, Russian Science Citation Index, SciELO Citation Index, Zoological Record) using the following search strategy:

- Concept #1: Suicide.

Suicide OR suicides OR self-harm OR "self harm" OR "self injury" OR self-injury OR "self-injurious behavior" OR "self-injurious behaviour" OR "self injurious behavior" OR "self injurious behaviour" OR "self cutting" OR self-cutting OR "suicide ideation" OR "suicidal ideation" OR "self poisoning" OR self-poisoning OR "suicidal poisoning" OR suicidal OR "suicidal overdose" OR "intentional drug overdose" OR "intentional overdose" OR automutilation OR auto-mutilation OR "self mutilation" OR self-mutilation OR parasuicide OR "suicidal thought" OR "suicidal thoughts"

- Concept #2: Pandemic.

Pandemic OR Pandemics OR Epidemic OR Epidemics OR Outbreak OR Outbreaks OR "Disease outbreaks" OR "Public health emergency" OR "Public health emergencies"

- Concept #3: Viruses and other infectious diseases.

Influenza OR "influenza A virus" OR "influenza pandemic" OR h2n2 OR h3n2 OR "Spanish flu" OR "Asian flu" OR "hong kong flu" OR ebola OR sars OR "severe acute respiratory syndrome" OR coronavirus OR "coronavirus infection" OR mers OR "middle east respiratory syndrome" OR covid OR betacoronavirus OR covid-19 OR "swine flu" OR zika OR arbovirus OR arboviruses OR dengue OR "yellow fever" OR "hemorrhagic fever" OR "haemorrhagic fever" OR encephalitis OR plague OR "sars virus" OR "zika virus" OR "zika virus infection" OR "bubonic plague" OR smallpox OR "small pox" OR h1n1 OR h7n9 OR chikungunya OR cholera OR "Crimean-congo hemorrhagic fever" OR "Crimean-congo haemorrhagic fever" OR "Crimean congo hemorrhagic fever" OR "Crimean congo haemorrhagic fever" OR "Hendra virus" OR "lassa fever" OR Marburg OR meningitis OR mers-cov OR monkeypox OR "nipah virus" OR "rift valley fever" OR tularaemia OR tularemia

*Strategy* = (Concept #1 AND Concept #2 AND Concept #3) OR (Concept #1 AND Concept #3).

## Grey literature search

A complementary search of preprints on the current pandemic was conducted in *PsyArXiv*, *medRxiv*, and *bioRxiv*.

- Concept #1: Suicide.

Suicide OR Suicides OR Self-harm OR Self-injury OR "Self-injurious behaviour" OR "Self-injurious behavior" OR "Suicidal ideation" OR Self-poisoning OR "Self poisoning" OR "Suicidal poisoning" OR automutilation OR "suicidal overdose" OR "Self harm" OR "Self injury" OR "Self mutilation" OR Self-mutilation OR Parasuicide OR "Intentional drug overdose" OR "Suicidal thoughts" OR "Suicidal thought" OR Self-cutting OR "Self cutting"

- Concept #2: COVID-19.

covid-19 OR coronavirus OR 2019-ncov OR sars-cov-2 OR cov-19

*Strategy* = (Concept #1 AND Concept #2)

## Inter-rater Reliability Analysis

**Table A. Cohen's kappa estimates**

| Stage 1 - Titles and abstracts screening |                    |          |          |                      |             |         |                |
|------------------------------------------|--------------------|----------|----------|----------------------|-------------|---------|----------------|
| Pair                                     | <i>n</i> Abstracts | <i>Z</i> | <i>p</i> | <i>Cohen's kappa</i> | 95% CI      | % agree | Judgement      |
| 1                                        | 242                | 0.88     | 0.187    | 0.39                 | −0.28; 1.07 | 98.7    | Fair           |
| 2                                        | 229                | 4.30     | < 0.0001 | 0.55                 | 0.37; 0.73  | 90.8    | Moderate       |
| 3                                        | 223                | 3.25     | < 0.0001 | 0.64                 | 0.40; 0.88  | 96.4    | Substantial    |
| Stage 2 - Full text screening            |                    |          |          |                      |             |         |                |
| Pair                                     | <i>n</i> Papers    | <i>Z</i> | <i>p</i> | <i>Cohen's kappa</i> | 95% CI      | % agree | Judgement      |
| 4                                        | 10                 | –        | –        | –                    | –           | 100     | Full agreement |
| 5                                        | 10                 | –        | –        | –                    | –           | 100     | Full agreement |
| 6                                        | 9                  | 1.15     | 0.124    | 0.61                 | −0.09; 1.33 | 90      | Substantial    |

*Note:* Pairs: 1 = CB & MMT; 2 = NEE & HMc; 3 = MJ & PC; 4 = EA & ROC; 5 = NEE & PL; 6 = SH & YC. Judgement: The judgement for the estimated kappa about the extent of agreement (Landis & Koch, 1977): If *kappa* is less than 0, "No agreement", if 0–0.2, "Slight agreement", if 0.2–0.4, "Fair agreement", if 0.4–0.6, "Moderate agreement", if 0.6–0.8, "Substantial agreement", if 0.8–1.0, "Almost perfect agreement".

All disagreements at stage 1 were resolved through discussions between pairs. A third referee (CB) assessed the eligibility of one publication that remained in disagreement for pair 6 (Falster et al., 2009), and decided upon its exclusion: the paper is outside of the scope of infectious disease-related public health emergencies, and suicide is not a primary condition.

# Data Extraction Tool

**Table B. Data extraction tool**

|               |       |
|---------------|-------|
| Title:        |       |
| Authors:      |       |
| Journal:      | Year: |
| Keywords:     |       |
| Aims:         |       |
| Study Design: |       |

*Sample:*

|                                          |                       |          |             |     |         |
|------------------------------------------|-----------------------|----------|-------------|-----|---------|
| N:                                       | Mean age & age range: | Country: | Gender: M = | F = | Other = |
| Sample:                                  |                       |          |             |     |         |
| Inclusion criteria:                      |                       |          |             |     |         |
| Exclusion criteria:                      |                       |          |             |     |         |
| Ethnicity:                               |                       |          |             |     |         |
| Sexuality:                               |                       |          |             |     |         |
| Study period (not the publication date): |                       |          |             |     |         |

*Measures:*

Suicidal thoughts and behaviors (including fatal Suicide attempt)

What was measured? (Constructs): (1) Suicide; (2) Suicidal thoughts/ideation; (3) Non-fatal self-harm (including suicide attempts).

Instrument: (1) Self-administered; (2) Experimenter/Interviewer Administered; (3) Surveillance/routine data?:

Self-harm (including fatal Self-harm)

What was measured? (Constructs): (1) Self-harm; (2) Self-harm thoughts/ideation

Instrument: (1) Self-administered or (2) Experimenter/ Administered?:

Public Health Emergency

What was it?

How was it assessed?

Main public health responses:

*Results:*

Main findings:

Effect sizes (specify type of effect size):

Potential mechanisms/Pathways to suicide/self-harm/other mental health co-morbidities:

Author's Interpretations:

Author's Limitations:

Reviewer's comments:



## Quality Assessment Framework

**Table C. Quality assessment form**

|                                                                             | Not adequate<br>(Score = 0)                                                        | Adequate<br>(Score = 1)                                                                                                                                       | Very good<br>(Score = 2)                                                                                                                                                       | Score |
|-----------------------------------------------------------------------------|------------------------------------------------------------------------------------|---------------------------------------------------------------------------------------------------------------------------------------------------------------|--------------------------------------------------------------------------------------------------------------------------------------------------------------------------------|-------|
| <b>Research design</b>                                                      | Cross-sectional;<br>Case study or other<br>brief comment<br>material;              | Longitudinal (retrospective);<br>Observational;                                                                                                               | Longitudinal<br>(prospective);<br>Randomized Controlled<br>Trial;                                                                                                              |       |
| <b>Measurement of<br/>suicide-related<br/>outcome</b>                       | Non-validated scale or<br>other means of self-<br>report (e.g. single<br>question) | Hospital admission where<br>intent has not been<br>established; suicide items<br>from a validated diagnostic/<br>mood rating scale (e.g.<br>HDRS, BDI, SADS). | Clinical interview;<br>validated suicide scale<br>(e.g. SIS, SAS); hospital<br>admission where intent<br>has been established;<br>death certificate/cause<br>of death register |       |
| <b>Relationship<br/>between public<br/>health emergency<br/>and outcome</b> | Poor quality evidence<br><br>No baseline;<br>No control for<br>confounders         | Good quality of evidence.<br><br>Has baseline;<br>No control for confounders                                                                                  | Very good quality<br>evidence<br><br>Consideration for<br>temporal relationship                                                                                                |       |
| <b>Study sample</b>                                                         | Unrepresentative of<br>target population                                           | Representative of target<br>population (at baseline)                                                                                                          | Representative of target<br>population (throughout<br>data collection phase of<br>study, consideration of<br>attrition)                                                        |       |
| <b>Are the analyses<br/>sufficiently<br/>powered/is power<br/>relevant</b>  | No.<br><br>Insufficiently powered;<br>Power is not reported                        | Yes<br><br>Power is reported and<br>acceptable                                                                                                                | -                                                                                                                                                                              |       |
| <b>Total</b>                                                                |                                                                                    |                                                                                                                                                               |                                                                                                                                                                                |       |

Note. Adapted from O'Connor and colleagues (2016).

## Additional Publications on the COVID-19 Pandemic and Suicide-Related Outcomes

### Preprint

Our complementary search of grey literature identified one preprint (Ammerman, Burke, Jacobucci, & McClure, 2020) (publication under peer-review; Table D). The results suggest that physical safety concerns and general distress due to COVID-19 were associated with increased past-month suicidal ideation, whereas changes to daily routine resulting from COVID-19 social distancing policies were associated with decreased past-month suicidal ideation. COVID-19-related experiences, such as general distress or the effects of social distancing policies, were associated with increased past-month attempted suicide (adjusted for age, gender, ethnicity, and past-month suicidal ideation). The investigators also reported that individuals who intentionally exposed themselves to COVID-19 were more likely to report past-month suicidal ideation and past-month suicide attempt(s).

**Table D. Characteristics of included pre-print.**

| Study, Country, and study period                           | Population                                                |                                                         | Public Health Emergency                                                                                                                                   |                                         | Suicide / Self-harm                                                                                                                                                                       | Main findings                                                                                                                                                                                                                                                                                                                                                                                                                                                                                                                                                                                                                                                                | Quality assessment |
|------------------------------------------------------------|-----------------------------------------------------------|---------------------------------------------------------|-----------------------------------------------------------------------------------------------------------------------------------------------------------|-----------------------------------------|-------------------------------------------------------------------------------------------------------------------------------------------------------------------------------------------|------------------------------------------------------------------------------------------------------------------------------------------------------------------------------------------------------------------------------------------------------------------------------------------------------------------------------------------------------------------------------------------------------------------------------------------------------------------------------------------------------------------------------------------------------------------------------------------------------------------------------------------------------------------------------|--------------------|
|                                                            | Sample / Source                                           | Sex / Age                                               | Exposure / Measures                                                                                                                                       | Main public health responses            | Outcomes / Measures                                                                                                                                                                       |                                                                                                                                                                                                                                                                                                                                                                                                                                                                                                                                                                                                                                                                              |                    |
| Ammerman et al. (2020) [USA] Study period: 3-4 April 2020. | N = 907<br>General population via Amazon Mechanical Turk. | Gender: M = 511; F = 387.<br>Age: Mean = 36.43 (18-74). | Exposure: COVID-19 pandemic. Measures: COVID-19-related experiences (e.g., exposure, distress about the disease, etc.) and intentional COVID-19 exposure. | Social distancing, stay-at-home orders. | Outcomes: Suicidal ideation, suicide attempt. Measures: Self-report items (two modified, face-valid items from the Self-Injurious Thoughts and Behaviors Interview by Nock et al. (2007). | Physical safety concerns and general distress due to COVID-19 were positively associated with past-month suicidal ideation ( $r = 0.45$ , $p < 0.01$ ). Daily routine impacts due to COVID-19 social distancing policies were negatively associated with past-month suicidal ideation. 45% of participants endorsing past-month suicidal thoughts reported their thoughts were explicitly linked to COVID-19. Individuals who intentionally exposed themselves to COVID-19 were more likely to report past-month suicidal ideation ( $\chi^2(1) = 64.16$ , $p < 0.001$ , $V = 0.27$ ) and past-month suicide attempt(s) ( $\chi^2(1) = 224.83$ , $p < 0.001$ , $V = 0.50$ ). | 3                  |

### **COVID-19 Case Studies**

Our search also identified a small number of case reports whose findings do not yet appear to have been replicated in well-designed trials but are nevertheless included here for completeness. These reports document additional potential associations between the COVID-19 pandemic and both suicide deaths and suicide attempts.

Four unique publications presenting ten cases of suicide-related outcomes in the context of epidemics were identified. One such report in India (Goyal, Chauhan, Chhikara, Gupta, & Singh, 2020) found that an individual took his own life after being informed by his doctor that he had contracted a viral illness, which he wrongly associated with COVID-19. In another report by Griffiths and Mamun (2020), a series of six cases (four from India, one from the Bangladesh, and one from the USA) illustrated suicidal behaviour among couples and suicide pacts from the press. The cases described were retrieved from the media, and involved couples who attempted or died by suicide in contexts associated with the COVID-19 pandemic, such as economic recession, psychological suffering, and movement restriction. The authors described some of the motivating factors for COVID-19-related suicides, including fear of infection, financial constraints resulting from economic recession associated with national lockdowns, harassment or victimization by others for having (or being thought to have) COVID-19, and the stress of being in isolation or quarantine.

In another report, Mamun and Griffiths (2020) described the case of a Bangladeshi man who thought he was infected with COVID-19 and took his own life after suffering severe prejudice and social avoidance by his village members. Two other cases of emergency department presentation due to attempted suicide in India were described by Sahoo and colleagues (2020), both related to apprehension of developing COVID-19, information overload, and psychological distress (anxiety and depressive symptoms). These reports highlight the role of the media (social media platforms, newspapers, radio/telecommunication services) in exacerbating fears around infection and a sense of panic among vulnerable populations.

## References

- Ammerman, B. A., Burke, T. A., Jacobucci, R., & McClure, K. (2020). Preliminary Investigation of the Association Between COVID-19 and Suicidal Thoughts and Behaviors in the U.S. *PsyArXiv Preprint*. <https://doi.org/10.31234/osf.io/68djp>
- Chan, S. M. S., Chiu, F. K. H., Lam, C. W. L., Leung, P. Y. V., & Conwell, Y. (2006). Elderly suicide and the 2003 SARS epidemic in Hong Kong. *International Journal of Geriatric Psychiatry, 21*(2), 113–118. <https://doi.org/10.1002/gps.1432>
- Cheung, Y. T., Chau, P. H., & Yip, P. S. F. F. (2008). A revisit on older adults suicides and Severe Acute Respiratory Syndrome (SARS) epidemic in Hong Kong. *International Journal of Geriatric Psychiatry, 23*(12), 1231–1238. <https://doi.org/10.1002/gps.2056>
- Falster, K., Choi, J. Y., Donovan, B., Duncombe, C., Mulhall, B., Sowden, D., ... on behalf of the Australian HIV Observational Database, the T. A. H. I. V. O. D. (2009). AIDS-related and non-AIDS-related mortality in the Asia-Pacific region in the era of combination antiretroviral treatment. *AIDS, 23*(17), 2323–2336. <https://doi.org/10.1097/QAD.0b013e328331910c>
- Goyal, K., Chauhan, P., Chhikara, K., Gupta, P., & Singh, M. P. (2020). Fear of COVID 2019: First suicidal case in India! *Asian Journal of Psychiatry, 49*, 101989. <https://doi.org/10.1016/j.ajp.2020.101989>
- Griffiths, M. D., & Mamun, M. A. (2020). COVID-19 suicidal behavior among couples and suicide pacts: Case study evidence from press reports. *Psychiatry Research, 289*, 113105. <https://doi.org/10.1016/j.psychres.2020.113105>
- Honigsbaum, M. (2010). The great dread: Cultural and psychological impacts and responses to the “Russian” influenza in the united kingdom, 1889-1893. *Social History of Medicine, 23*(2), 299–319. <https://doi.org/10.1093/shm/hkq011>
- Huang, C.-C., Yen, D. H.-T., Huang, H.-H., Kao, W.-F., Wang, L.-M., Huang, C.-I., & Lee, C.-H. (2005). Impact of severe acute respiratory syndrome (SARS) outbreaks on the use of emergency department medical resources. *Journal of the Chinese Medical Association, 68*(6), 254–259. [https://doi.org/10.1016/S1726-4901\(09\)70146-7](https://doi.org/10.1016/S1726-4901(09)70146-7)
- Keita, M. M., Taverne, B., Savané, S. S., March, L., Doukoure, M., Sow, M. S., ... Delaporte, E. (2017).

- Depressive symptoms among survivors of Ebola virus disease in Conakry (Guinea): Preliminary results of the PostEboGui cohort. *BMC Psychiatry*, *17*(1), 127. <https://doi.org/10.1186/s12888-017-1280-8>
- Landis, J. R., & Koch, G. G. (1977). The Measurement of Observer Agreement for Categorical Data. *Biometrics*, *33*(1), 159–174. <https://doi.org/10.2307/2529310>
- Mamun, M. A., & Griffiths, M. D. (2020). First COVID-19 suicide case in Bangladesh due to fear of COVID-19 and xenophobia: Possible suicide prevention strategies. *Asian Journal of Psychiatry*, *51*, 102073. <https://doi.org/10.1016/j.ajp.2020.102073>
- O'Connor, D. B., Ferguson, E., Green, J. A., O'Carroll, R. E., & O'Connor, R. C. (2016). Cortisol levels and suicidal behavior: A meta-analysis. *Psychoneuroendocrinology*, *63*, 370–379. <https://doi.org/10.1016/j.psyneuen.2015.10.011>
- Okusaga, O., Yolken, R. H., Langenberg, P., Lapidus, M., Arling, T. A., Dickerson, F. B., ... Postolache, T. T. (2011). Association of seropositivity for influenza and coronaviruses with history of mood disorders and suicide attempts. *Journal of Affective Disorders*, *130*(1–2), 220–225. <https://doi.org/10.1016/j.jad.2010.09.029>
- Sahoo, S., Rani, S., Parveen, S., Pal Singh, A., Mehra, A., Chakrabarti, S., ... Tandup, C. (2020). Self-harm and COVID-19 Pandemic: An emerging concern – A report of 2 cases from India. *Asian Journal of Psychiatry*, *51*, 102104. <https://doi.org/10.1016/j.ajp.2020.102104>
- Wasserman, I. M. (1992). The Impact of Epidemic, War, Prohibition and Media on Suicide: United States, 1910–1920. *Suicide and Life-Threatening Behavior*, *22*(2), 240–254. <https://doi.org/10.1111/j.1943-278X.1992.tb00231.x>
- Yip, P. S. F. F., Cheung, Y. T., Chau, P. H., & Law, Y. W. (2010). The impact of epidemic outbreak: The case of severe acute respiratory syndrome (SARS) and suicide among older adults in Hong Kong. *Crisis*, *31*(2), 86–92. <https://doi.org/10.1027/0227-5910/a000015>
